# Supplementary material for: Few-layered graphene increases the response of nociceptive neurons to irritant stimuli
Source: Royal Society of Chemistry journal article supplement (doi:10.1039/d3nr03790h), 2024-01-01
Supplement: d3nr03790h1.pdf [file d3nr03790h1.pdf]

# Supporting Information for

## **Few-layered graphene increases the response of nociceptive neurons to irritant stimuli**

Lieselot Deleye,<sup>a†</sup> Francesca Franchi,<sup>a†</sup> Martina Trevisani,<sup>a,b</sup> Fabrizio Loiacono,<sup>c</sup> Silvia Vercellino,<sup>a,c</sup> Doriana Debellis,<sup>d</sup> Nara Liessi,<sup>e</sup> Andrea Armirotti,<sup>e</sup> Ester Vázquez,<sup>f</sup> Pierluigi Valente,<sup>b,\*§</sup> Valentina Castagnola<sup>a,c,\*§</sup>, Fabio Benfenati<sup>a,c,\*§</sup>

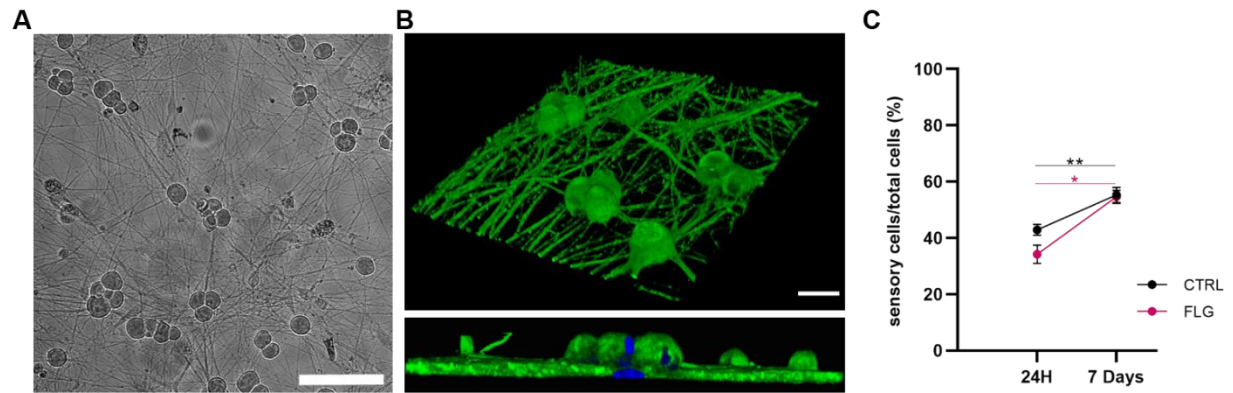

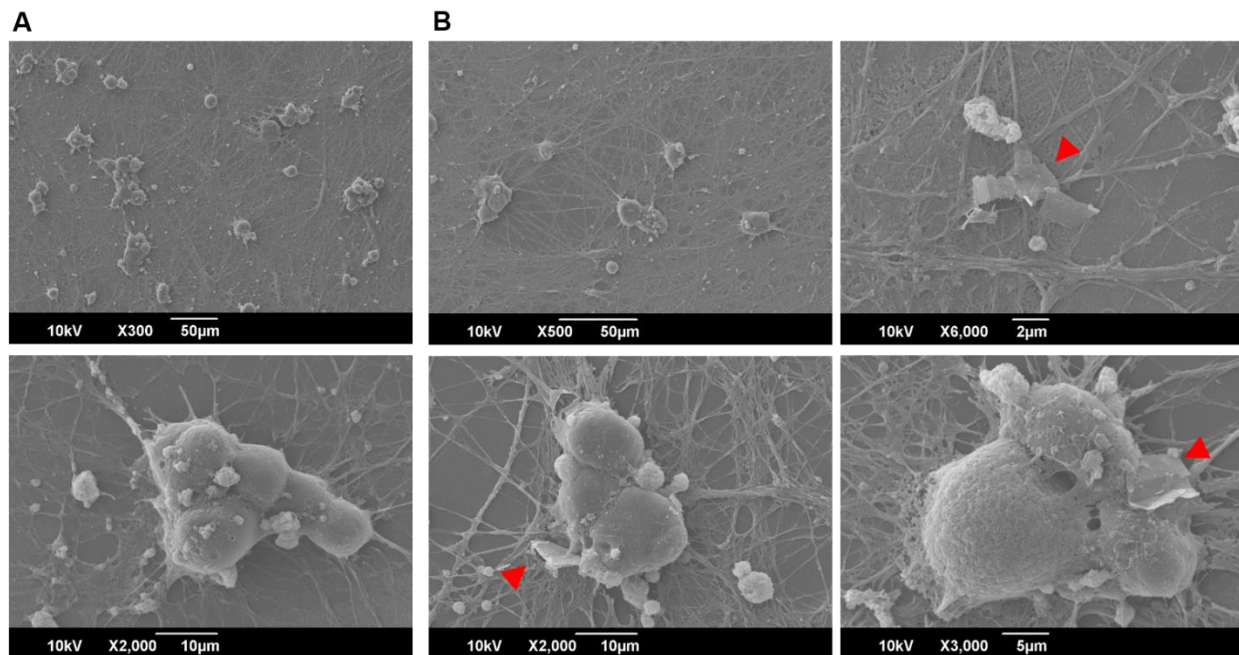

**Figure S2. Morphology of DRG sensory neurons exposed to FLG.** Representative SEM micrographs of DRG neuron cultures at different magnification. **A)** Untreated control neurons and **B)** neurons treated with FLG for 24 h. Extracellular GRM flakes are highlighted with red arrows.

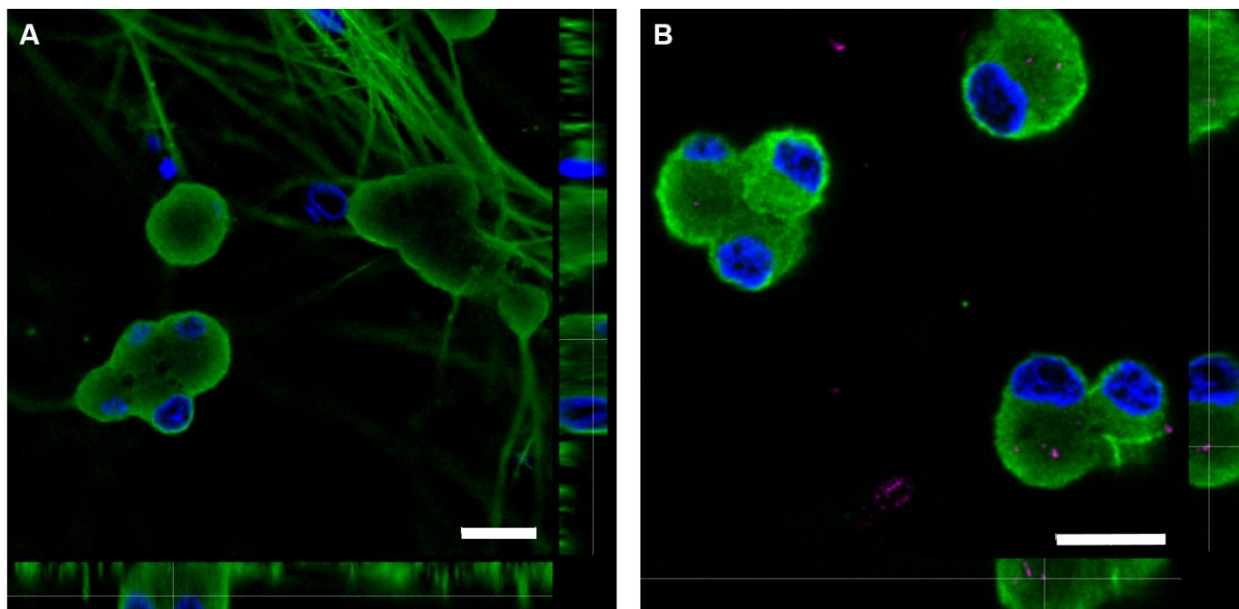

**Figure S3. FLG internalization visualized through reflective light at the confocal microscope. A)** CTRL and **B)** FLG.  $\beta$ 3-tubulin III (green); DAPI (blue); Graphene (Pink). Pictures are taken at one focal plane of a z-stack at 63x magnification. Since the sensory cell bodies pop out from the planar plane, not all axons are visible in this picture (see Figure S1). Scale bars, 20  $\mu$ m.

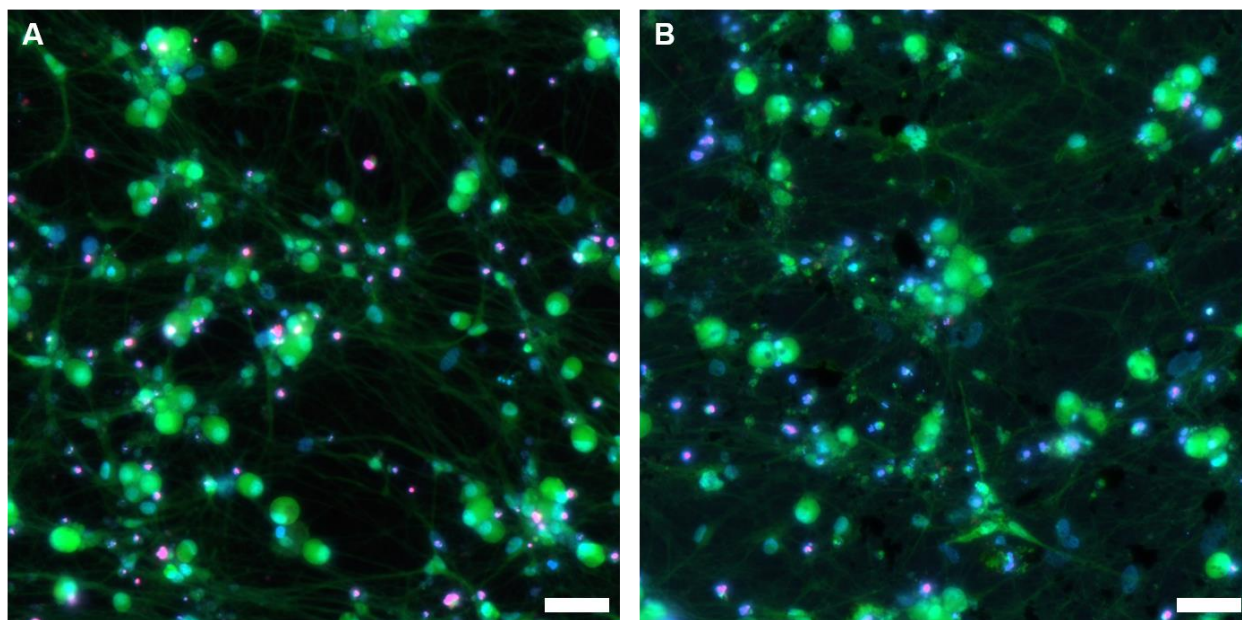

**Figure S4. Viability of DRG sensory neurons upon FLG exposure.** Calcein-AM (green) and PI (red) staining of DRG neuron cultures at DIV4, exposed for 24 h to  $100 \mu\text{g mL}^{-1}$  of colloidal FLG. Nuclei are visualized by Hoechst staining (blue). **A)** CTRL and **B)** FLG-treated samples at 10x magnification. Scale bars, 50  $\mu\text{m}$ .

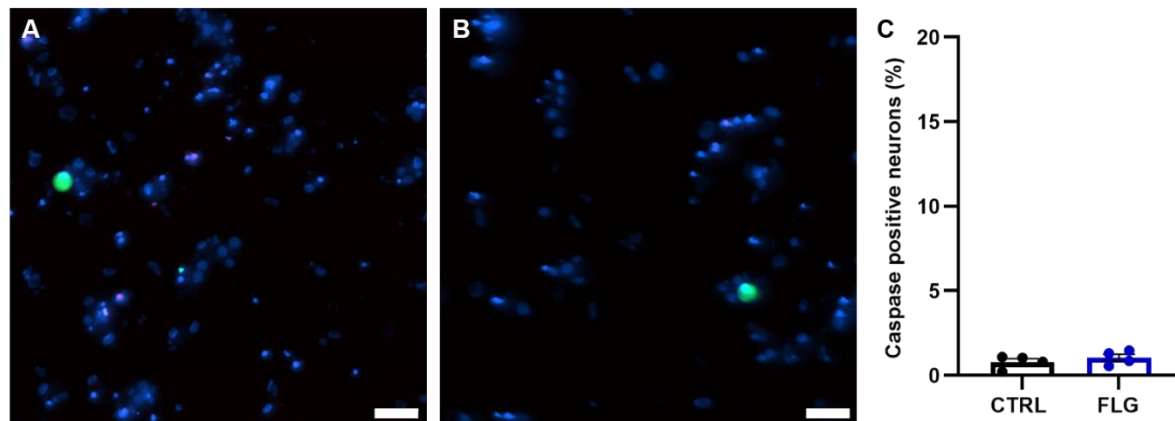

**Figure S5. Evaluation of apoptosis cascade activation upon FLG exposure.** Caspase 3/7 staining of DRG neuron cultures at DIV4, exposed for 24 h to  $100 \mu\text{g mL}^{-1}$  of colloidal FLG. **A)** CTRL, **B)** FLG and **C)** Percentage of sensory neurons expressing active Caspase over total number of sensory neurons. All data are expressed as means  $\pm$  SEM;  $N=3$  (4 replicates). Statistical analysis was performed using the Student's *t*-test. Caspase (green), DAPI (blue) and PI (red) at 10x magnification. Scale bars, 50  $\mu\text{m}$ .

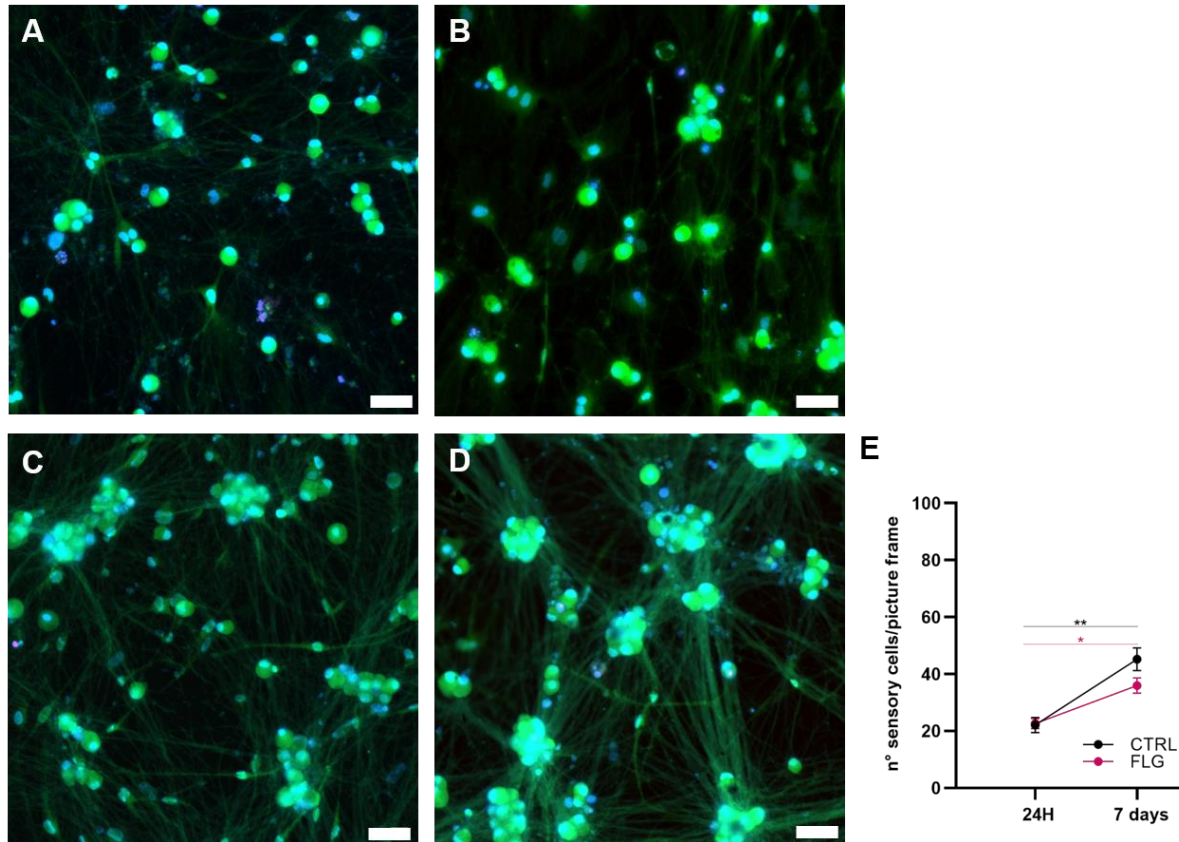

**Figure S6. Sensory neuron clustering over time.** DRG neurons live stained with Calcein AM (green), DAPI (blue) and PI (red) at 10x magnification from **A)** CTRL and **B)** FLG 10  $\mu\text{g mL}^{-1}$  at DIV5 (24 h treatment); **C)** CTRL and **D)** FLG at DIV11 (7-day treatment). **E)** Number of sensory neurons per picture frame. All data are expressed as means  $\pm$  SEM;  $N=3$  (3/4 replicates). \*\* $p=0.0091$ ; \* $p=0.0149$ , unpaired Student's  $t$ -test. Scale bars, 50  $\mu\text{m}$ .



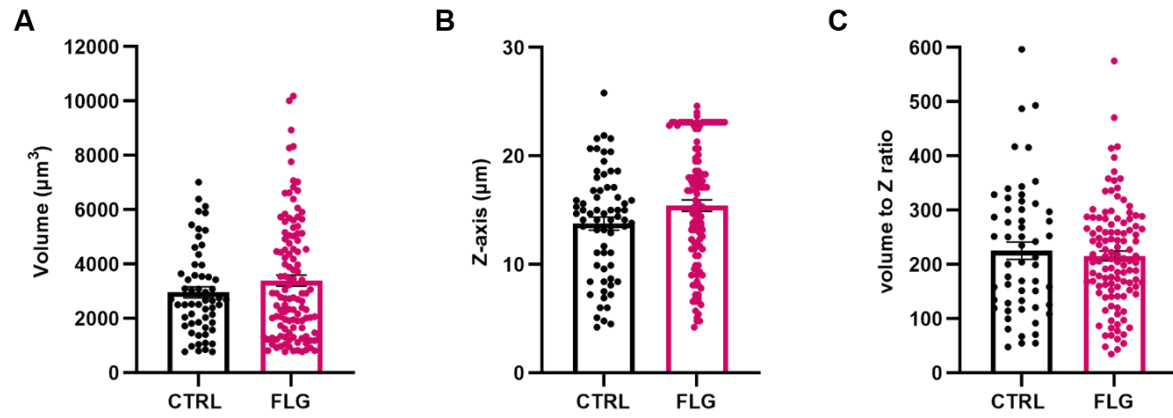

**Figure S7. 3D morphological analysis.** **A)** Volume of neuron soma, **B)** length of Z-axis and **C)** soma volume/soma height for DRG neuron cultures at DIV4, exposed for 24 h to  $10 \mu\text{g mL}^{-1}$  of FLG. Each point represents a single neuron. All data are expressed as means  $\pm$  SEM,  $N=3$  (6 different cultures). Unpaired Student's *t*-test/Mann-Whitney *U*-test.



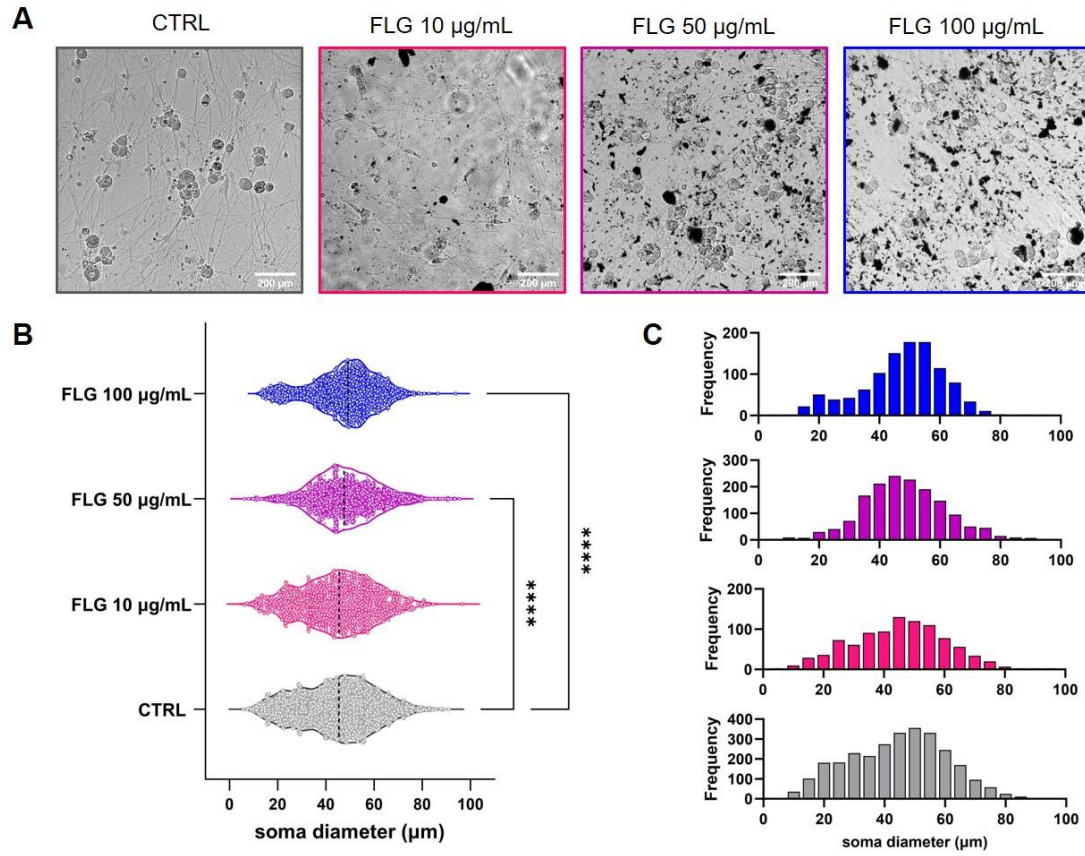

**Figure S8. DRG size distribution analysis.** **A)** Representative bright field (BF) images used for the 2D size distribution analysis. For increasing concentrations of FLG, dark agglomerates of increasing entities can be noticed. Scale bars: 200 µm. **B)** Violin plots representing the soma diameters when incubated with the different FLG doses (10 µg/mL: 955 cells; 50 µg/mL: 1573 cells; 100 µg/mL: 1074 cells) compared to untreated (CTRL: 2851 cells) conditions. Median value is represented by the black dotted line. Statistical analysis is one-way ANOVA with Tukey's post hoc test, \*\*\*\*= $p < 0.0001$ . **C)** Statistical size distributions of the soma diameters when incubated with the different FLG doses compared to untreated (CTRL) conditions. Bin size = 5.

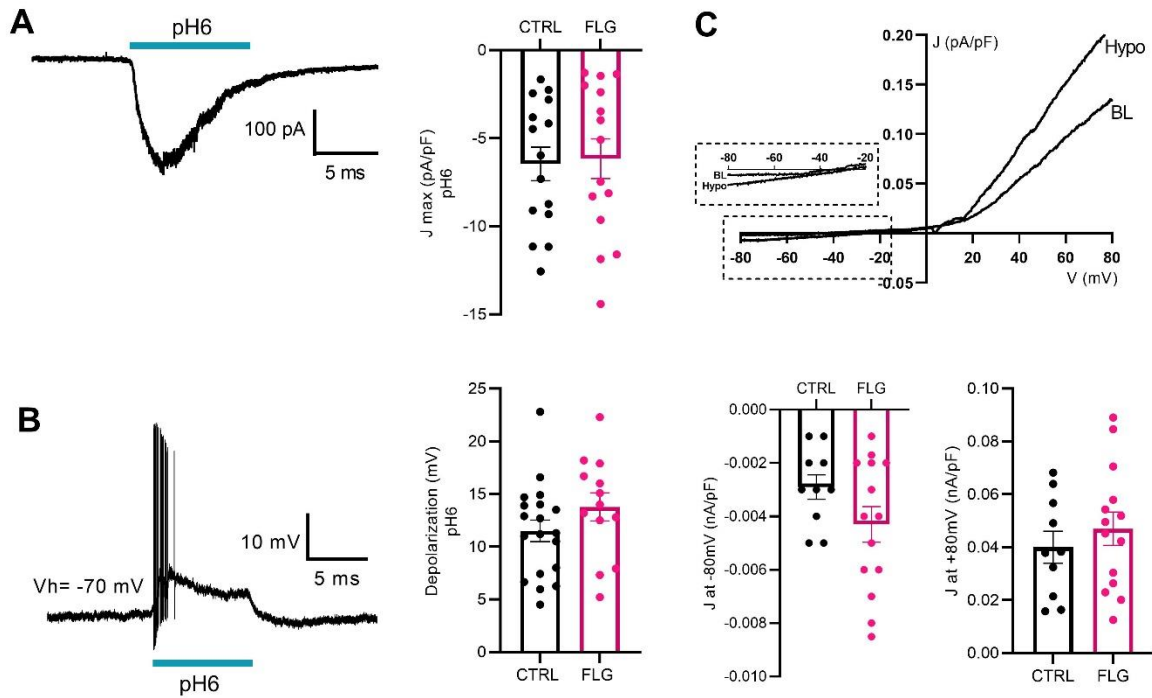

**Figure S9. Response of DRG sensory neurons to pH and hypotonic solution.** **A) Left:** Representative pH 6-elicited inward currents recorded at a holding potential of -70 mV in control and FLG-treated neurons. **Right:** Quantitative evaluation of current density after pH 6 stimulus under both experimental conditions (CTRL, n=15; FLG, n=15). **B) Left:** Representative current-clamp recordings of membrane depolarization evoked by pH 6 application in CTRL and FLG-treated neurons. **Right:** Quantitative evaluation of pH 6-dependent depolarization studied under both experimental conditions (CTRL, n=19; FLG, n=13). **C) Top:** Representative currents elicited by standard solution (baseline, BL) and hypotonic solution (Hypo) using a voltage ramp protocol. In the inset, magnification of the currents recorded in the -20 to -80 mV range. **Bottom:** Quantitative evaluation of whole-cell currents recorded at 80 mV and -80 mV in CTRL and FLG-treated neurons (CTRL, n=10; FLG, n=14). Data are expressed as means  $\pm$  SEM. Statistical analysis was performed using the unpaired Student's *t*-test.

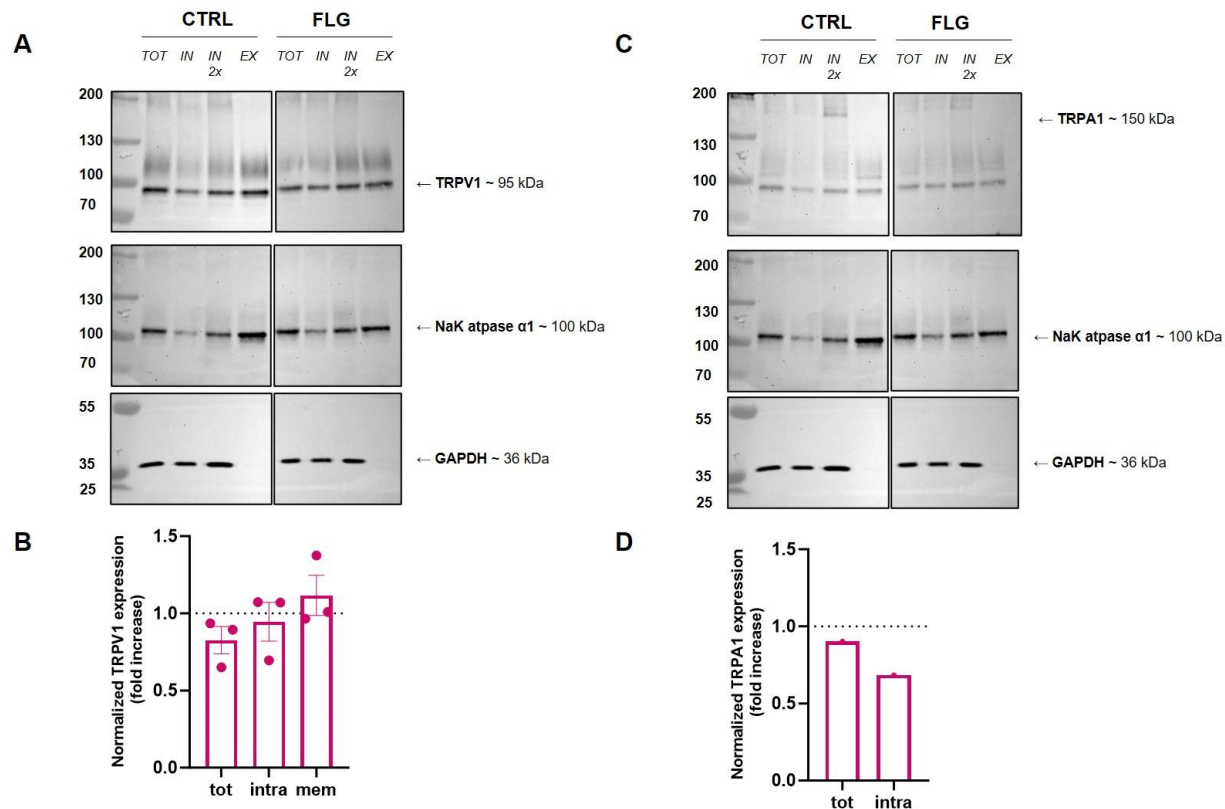

**Figure S10. TRPV1 and TRPA1 expression and translocation.** Western blotting (WB) was performed on DRG lysates at DIV4, after 24 h exposure to  $10 \mu\text{g mL}^{-1}$  of FLG. Lysine biotinylation was performed to separate membrane and intracellular compartments to quantify the plasma membrane and intracellular fractions of the channels. **A)** Representative WB stained with antibodies to TRPV1 (95 kDa), the intracellular protein GAPDH (36 kDa), and the plasma membrane-associated protein  $\text{Na}^+/\text{K}^+$  ATPase (100 kDa). **B)** Quantification of TRPV1 expression in FLG-treated ( $10 \mu\text{g/mL}$ , 24 h) samples (total, intracellular, and membrane compartments) normalized over untreated control conditions. Data are expressed as means  $\pm$  SEM,  $N=3$ . **C)** Representative WB stained with antibodies to TRPA1, GAPDH, and  $\text{Na}^+/\text{K}^+$  ATPase. The extracellular lane is empty because TRPA1 does not contain lysine residues in the extracellular loops. **D)** Quantification of TRPA1 expression (total, intracellular) normalized over untreated control conditions ( $N=1$ ).

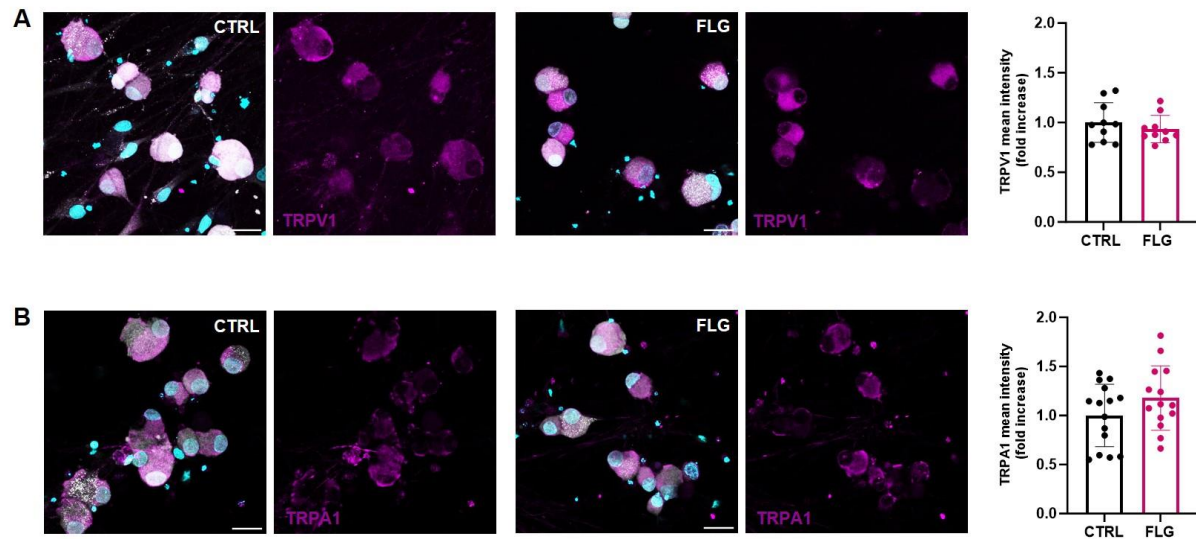

**Figure S11. Extracellular TRPV1 and TRPA1.** Representative confocal images (left panels) and fluorescence intensity quantification (right panels) of the extracellular exposure of TRPV1 (**A**) and TRPA1 (**B**) labeled by specific antibodies in non-permeabilized control and FLG-treated (10  $\mu$ g/mL, 24 h) DRG neurons. Nuclei (cyan), intracellular compartment (gray), and channels (purple). Scale bars, 25  $\mu$ m.
